# Supplementary material for: {Gd<sup>III</sup><sub>7</sub>} and {Gd<sup>III</sup><sub>14</sub>} Clusters Based on Rhodamine 6G Ligand with Magnetocaloric Effect
Source: Preprints.org preprint supplement (doi:10.20944/preprints202401.0084.v1), 2024-01-03

## checkCIF/PLATON report

You have not supplied any structure factors. As a result the full set of tests cannot be run.

THIS REPORT IS FOR GUIDANCE ONLY. IF USED AS PART OF A REVIEW PROCEDURE FOR PUBLICATION, IT SHOULD NOT REPLACE THE EXPERTISE OF AN EXPERIENCED CRYSTALLOGRAPHIC REFEREE.

No syntax errors found.      CIF dictionary      Interpreting this report

### Datablock: gd\_auto

---

Bond precision:    C-C = 0.0265 A                      Wavelength=1.54184

Cell:                      a=27.7525 (9)              b=27.7525 (9)              c=24.9438 (7)  
                                alpha=90              beta=90              gamma=90

Temperature:              173 K

|                        | Calculated                                                   | Reported                                                                 |
|------------------------|--------------------------------------------------------------|--------------------------------------------------------------------------|
| Volume                 | 19211.8 (14)                                                 | 19211.7 (13)                                                             |
| Space group            | P 4/n                                                        | P 4/n                                                                    |
| Hall group             | -P 4a                                                        | -P 4a                                                                    |
| Moiety formula         | C264 H272 Gd14 N48 O91,<br>8 (C2 H3 N), 9 (O) [+<br>solvent] | C264 H272 Gd14 N48 O91,<br>8 (C2 H3 N), 9 (H2 O),<br>1.5 [CH3CN], 2 [CH3 |
| Sum formula            | C280 H296 Gd14 N56 O100 [+<br>solvent]                       | C285 H330.5 Gd14 N57.5 O104                                              |
| Mr                     | 8247.25                                                      | 8427.05                                                                  |
| Dx, g cm <sup>-3</sup> | 1.426                                                        | 1.457                                                                    |
| Z                      | 2                                                            | 2                                                                        |
| Mu (mm <sup>-1</sup> ) | 15.984                                                       | 16.005                                                                   |
| F000                   | 8128.0                                                       | 8342.0                                                                   |
| F000'                  | 7909.51                                                      |                                                                          |
| h, k, lmax             | 34, 34, 31                                                   | 31, 33, 30                                                               |
| Nref                   | 19516                                                        | 19020                                                                    |
| Tmin, Tmax             | 0.107, 0.091                                                 | 0.376, 1.000                                                             |
| Tmin'                  | 0.021                                                        |                                                                          |

Correction method= # Reported T Limits: Tmin=0.376 Tmax=1.000  
AbsCorr = MULTII-SCAN

Data completeness= 0.975

Theta (max)= 73.942

R(reflections)= 0.0900 ( 9251)

wR2(reflections)=  
0.3012 ( 19020)

S = 0.981

Npar= 1042

---

The following ALERTS were generated. Each ALERT has the format

**test-name\_ALERT\_alert-type\_alert-level.**

Click on the hyperlinks for more details of the test.

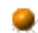

### Alert level B

PLAT201\_ALERT\_2\_B Isotropic non-H Atoms in Main Residue(s) ..... 1 Report  
C70

**Author Response: The Ueq value of C70 is too large, and isotropic refinement was carried out.**

PLAT220\_ALERT\_2\_B NonSolvent Resd 1 C Ueq(max)/Ueq(min) Range 9.1 Ratio

**Author Response: The single crystal X-ray diffraction data of the complex is not very good, leading to the Ueq(max)/Ueq(min) Range.**

PLAT242\_ALERT\_2\_B Low 'MainMol' Ueq as Compared to Neighbors of C32 Check

**Author Response: The single crystal X-ray diffraction data of the complex is not very good. The atom assignment is correct.**

PLAT242\_ALERT\_2\_B Low 'MainMol' Ueq as Compared to Neighbors of C63 Check

**Author Response: The single crystal X-ray diffraction data of the complex is not very good. The atom assignment is correct.**

PLAT342\_ALERT\_3\_B Low Bond Precision on C-C Bonds ..... 0.02653 Ang.

**Author Response: The single crystal X-ray diffraction data of the complex is not very good, resulting in Low Bond Precision.**

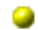

### Alert level C

PLAT026\_ALERT\_3\_C Ratio Observed / Unique Reflections (too) Low .. 49% Check  
PLAT084\_ALERT\_3\_C High wR2 Value (i.e. > 0.25) ..... 0.30 Report  
PLAT094\_ALERT\_2\_C Ratio of Maximum / Minimum Residual Density .... 2.02 Report  
PLAT213\_ALERT\_2\_C Atom C1 has ADP max/min Ratio ..... 3.1 oblate  
PLAT213\_ALERT\_2\_C Atom C4 has ADP max/min Ratio ..... 3.5 prolat  
PLAT220\_ALERT\_2\_C NonSolvent Resd 1 O Ueq(max)/Ueq(min) Range 4.9 Ratio

**Author Response: The single crystal X-ray diffraction data of the complex is not very good, leading to the Ueq(max)/Ueq(min) Range.**

|                   |            |           |     |                             |       |      |       |
|-------------------|------------|-----------|-----|-----------------------------|-------|------|-------|
| PLAT222_ALERT_3_C | NonSolvent | Resd 1    | H   | Uiso(max)/Uiso(min)         | Range | 10.0 | Ratio |
| PLAT241_ALERT_2_C | High       | 'MainMol' | Ueq | as Compared to Neighbors of |       | 03   | Check |
| PLAT241_ALERT_2_C | High       | 'MainMol' | Ueq | as Compared to Neighbors of |       | 06   | Check |
| PLAT241_ALERT_2_C | High       | 'MainMol' | Ueq | as Compared to Neighbors of |       | 07   | Check |
| PLAT241_ALERT_2_C | High       | 'MainMol' | Ueq | as Compared to Neighbors of |       | 08   | Check |
| PLAT241_ALERT_2_C | High       | 'MainMol' | Ueq | as Compared to Neighbors of |       | 010  | Check |
| PLAT241_ALERT_2_C | High       | 'MainMol' | Ueq | as Compared to Neighbors of |       | 011  | Check |
| PLAT241_ALERT_2_C | High       | 'MainMol' | Ueq | as Compared to Neighbors of |       | C5   | Check |
| PLAT241_ALERT_2_C | High       | 'MainMol' | Ueq | as Compared to Neighbors of |       | C7   | Check |
| PLAT241_ALERT_2_C | High       | 'MainMol' | Ueq | as Compared to Neighbors of |       | C12  | Check |
| PLAT241_ALERT_2_C | High       | 'MainMol' | Ueq | as Compared to Neighbors of |       | C45  | Check |
| PLAT242_ALERT_2_C | Low        | 'MainMol' | Ueq | as Compared to Neighbors of |       | Gd1  | Check |

**Author Response: The single crystal X-ray diffraction data of the complex is not very good. The atom assignment is correct.**

|                   |     |           |     |                             |  |     |       |
|-------------------|-----|-----------|-----|-----------------------------|--|-----|-------|
| PLAT242_ALERT_2_C | Low | 'MainMol' | Ueq | as Compared to Neighbors of |  | Gd5 | Check |
|-------------------|-----|-----------|-----|-----------------------------|--|-----|-------|

**Author Response: The single crystal X-ray diffraction data of the complex is not very good. The atom assignment is correct.**

|                   |     |           |     |                             |  |    |       |
|-------------------|-----|-----------|-----|-----------------------------|--|----|-------|
| PLAT242_ALERT_2_C | Low | 'MainMol' | Ueq | as Compared to Neighbors of |  | N7 | Check |
|-------------------|-----|-----------|-----|-----------------------------|--|----|-------|

**Author Response: The single crystal X-ray diffraction data of the complex is not very good. The atom assignment is correct.**

|                   |     |           |     |                             |  |    |       |
|-------------------|-----|-----------|-----|-----------------------------|--|----|-------|
| PLAT242_ALERT_2_C | Low | 'MainMol' | Ueq | as Compared to Neighbors of |  | C6 | Check |
|-------------------|-----|-----------|-----|-----------------------------|--|----|-------|

**Author Response: The single crystal X-ray diffraction data of the complex is not very good. The atom assignment is correct.**

|                   |     |           |     |                             |  |     |       |
|-------------------|-----|-----------|-----|-----------------------------|--|-----|-------|
| PLAT242_ALERT_2_C | Low | 'MainMol' | Ueq | as Compared to Neighbors of |  | C25 | Check |
|-------------------|-----|-----------|-----|-----------------------------|--|-----|-------|

**Author Response: The single crystal X-ray diffraction data of the complex is not very good. The atom assignment is correct.**

|                   |     |           |     |                             |  |     |       |
|-------------------|-----|-----------|-----|-----------------------------|--|-----|-------|
| PLAT242_ALERT_2_C | Low | 'MainMol' | Ueq | as Compared to Neighbors of |  | C30 | Check |
|-------------------|-----|-----------|-----|-----------------------------|--|-----|-------|

**Author Response: The single crystal X-ray diffraction data of the complex is not very good. The atom assignment is correct.**

PLAT242\_ALERT\_2\_C Low 'MainMol' Ueq as Compared to Neighbors of C54 Check

**Author Response: The single crystal X-ray diffraction data of the complex is not very good. The atom assignment is correct.**

PLAT242\_ALERT\_2\_C Low 'MainMol' Ueq as Compared to Neighbors of C65 Check

**Author Response: The single crystal X-ray diffraction data of the complex is not very good. The atom assignment is correct.**

PLAT244\_ALERT\_4\_C Low 'Solvent' Ueq as Compared to Neighbors of C64 Check  
PLAT260\_ALERT\_2\_C Large Average Ueq of Residue Including N13 0.166 Check  
PLAT260\_ALERT\_2\_C Large Average Ueq of Residue Including N14 0.173 Check  
PLAT260\_ALERT\_2\_C Large Average Ueq of Residue Including O1W 0.120 Check  
PLAT260\_ALERT\_2\_C Large Average Ueq of Residue Including O2W 0.150 Check  
PLAT260\_ALERT\_2\_C Large Average Ueq of Residue Including O3W 0.187 Check  
PLAT260\_ALERT\_2\_C Large Average Ueq of Residue Including O5W 0.223 Check  
PLAT260\_ALERT\_2\_C Large Average Ueq of Residue Including O4W 0.140 Check  
PLAT334\_ALERT\_2\_C Small <C-C> Benzene Dist. C9 -C14 . 1.37 Ang.  
PLAT334\_ALERT\_2\_C Small <C-C> Benzene Dist. C49 -C54 . 1.37 Ang.  
PLAT360\_ALERT\_2\_C Short C(sp3)-C(sp3) Bond C65 - C66 . 1.40 Ang.  
PLAT362\_ALERT\_2\_C Short C(sp3)-C(sp2) Bond C25 - C29 . 1.41 Ang.  
PLAT362\_ALERT\_2\_C Short C(sp3)-C(sp2) Bond C46 - C47 . 1.35 Ang.  
PLAT420\_ALERT\_2\_C D-H Bond Without Acceptor N3 --H3 . Please Check

### Alert level G

FORMU01\_ALERT\_1\_G There is a discrepancy between the atom counts in the \_chemical\_formula\_sum and \_chemical\_formula\_moiety. This is usually due to the moiety formula being in the wrong format.  
Atom count from \_chemical\_formula\_sum: C285 H330.5 Gd14 N57.5 O104  
Atom count from \_chemical\_formula\_moiety: C283 H318.5 Gd14 N57.5 O100

FORMU01\_ALERT\_2\_G There is a discrepancy between the atom counts in the \_chemical\_formula\_sum and the formula from the \_atom\_site\* data.  
Atom count from \_chemical\_formula\_sum: C285 H330.5 Gd14 N57.5 O104  
Atom count from the \_atom\_site data: C280 H296 Gd14 N56 O100

CELLZ01\_ALERT\_1\_G Difference between formula and atom\_site contents detected.

CELLZ01\_ALERT\_1\_G ALERT: Large difference may be due to a

symmetry error - see SYMMG tests

From the CIF: \_cell\_formula\_units\_Z 2

From the CIF: \_chemical\_formula\_sum C285 H330.5 Gd14 N57.5 O104

TEST: Compare cell contents of formula and atom\_site data

| atom | Z*formula | cif sites | diff  |
|------|-----------|-----------|-------|
| C    | 570.00    | 560.00    | 10.00 |
| H    | 661.00    | 592.00    | 69.00 |
| Gd   | 28.00     | 28.00     | 0.00  |
| N    | 115.00    | 112.00    | 3.00  |
| O    | 208.00    | 200.00    | 8.00  |

PLAT002\_ALERT\_2\_G Number of Distance or Angle Restraints on AtSite 9 Note

PLAT003\_ALERT\_2\_G Number of Uiso or Uij Restrained non-H Atoms ... 11 Report

PLAT007\_ALERT\_5\_G Number of Unrefined Donor-H Atoms ..... 10 Report

H1 H3 H4 H4A H7 H8 H21 H22 H23 H25

PLAT041\_ALERT\_1\_G Calc. and Reported SumFormula Strings Differ Please Check

Calc: C280 H296 Gd14 N56 O100  
Rep.: C285 H330.5 Gd14 N57.5 O104

PLAT042\_ALERT\_1\_G Calc. and Reported MoietyFormula Strings Differ Please Check  
Calc: C264 H272 Gd14 N48 O91, 8(C2 H3 N), 9(O)  
Rep.: C264 H272 Gd14 N48 O91, 8(C2 H3 N), 9(H2 O),  
1.5[CH3CN], 2[CH3OH], 2[H2O]

PLAT172\_ALERT\_4\_G The CIF-Embedded .res File Contains DFIX Records 7 Report  
PLAT174\_ALERT\_4\_G The CIF-Embedded .res File Contains FLAT Records 1 Report  
PLAT186\_ALERT\_4\_G The CIF-Embedded .res File Contains ISOR Records 5 Report  
PLAT300\_ALERT\_4\_G Atom Site Occupancy of H1 Constrained at 0.5 Check  
PLAT300\_ALERT\_4\_G Atom Site Occupancy of H4A Constrained at 0.5 Check  
PLAT300\_ALERT\_4\_G Atom Site Occupancy of O1W Constrained at 0.5 Check  
PLAT300\_ALERT\_4\_G Atom Site Occupancy of O2W Constrained at 0.5 Check  
PLAT300\_ALERT\_4\_G Atom Site Occupancy of O3W Constrained at 0.5 Check  
PLAT300\_ALERT\_4\_G Atom Site Occupancy of O5W Constrained at 0.5 Check  
PLAT300\_ALERT\_4\_G Atom Site Occupancy of O4W Constrained at 0.25 Check  
PLAT302\_ALERT\_4\_G Anion/Solvent/Minor-Residue Disorder (Resd 4) 100% Note  
PLAT302\_ALERT\_4\_G Anion/Solvent/Minor-Residue Disorder (Resd 5) 100% Note  
PLAT302\_ALERT\_4\_G Anion/Solvent/Minor-Residue Disorder (Resd 6) 100% Note  
PLAT302\_ALERT\_4\_G Anion/Solvent/Minor-Residue Disorder (Resd 7) 100% Note  
PLAT302\_ALERT\_4\_G Anion/Solvent/Minor-Residue Disorder (Resd 8) 100% Note  
PLAT304\_ALERT\_4\_G Non-Integer Number of Atoms in ..... (Resd 4) 0.50 Check  
PLAT304\_ALERT\_4\_G Non-Integer Number of Atoms in ..... (Resd 5) 0.50 Check  
PLAT304\_ALERT\_4\_G Non-Integer Number of Atoms in ..... (Resd 6) 0.50 Check  
PLAT304\_ALERT\_4\_G Non-Integer Number of Atoms in ..... (Resd 7) 0.50 Check  
PLAT304\_ALERT\_4\_G Non-Integer Number of Atoms in ..... (Resd 8) 0.25 Check  
PLAT311\_ALERT\_2\_G Isolated Disordered Oxygen Atom (No H's ?) ..... 01W Check  
PLAT311\_ALERT\_2\_G Isolated Disordered Oxygen Atom (No H's ?) ..... 02W Check  
PLAT311\_ALERT\_2\_G Isolated Disordered Oxygen Atom (No H's ?) ..... 03W Check  
PLAT311\_ALERT\_2\_G Isolated Disordered Oxygen Atom (No H's ?) ..... 05W Check  
PLAT311\_ALERT\_2\_G Isolated Disordered Oxygen Atom (No H's ?) ..... 04W Check  
PLAT414\_ALERT\_2\_G Short Intra D-H...H-X H1 ..H2 . 2.14 Ang.  
x,y,z = 1\_555 Check  
PLAT414\_ALERT\_2\_G Short Intra D-H...H-X H4A ..H35 . 2.13 Ang.  
x,y,z = 1\_555 Check  
PLAT432\_ALERT\_2\_G Short Inter X...Y Contact O12 ..C69 . 2.97 Ang.  
x,y,z = 1\_555 Check  
PLAT606\_ALERT\_4\_G Solvent Accessible VOID(S) in Structure ..... ! Info  
PLAT790\_ALERT\_4\_G Centre of Gravity not Within Unit Cell: Resd. # 2 Note  
C2 H3 N  
PLAT790\_ALERT\_4\_G Centre of Gravity not Within Unit Cell: Resd. # 6 Note  
O  
PLAT794\_ALERT\_5\_G Tentative Bond Valency for Gd2 (III) . 2.96 Info  
PLAT794\_ALERT\_5\_G Tentative Bond Valency for Gd3 (III) . 3.31 Info  
PLAT794\_ALERT\_5\_G Tentative Bond Valency for Gd4 (III) . 2.76 Info  
PLAT860\_ALERT\_3\_G Number of Least-Squares Restraints ..... 78 Note  
PLAT868\_ALERT\_4\_G ALERTS Due to the Use of \_smtbx\_masks Suppressed ! Info  
PLAT883\_ALERT\_1\_G No Info/Value for \_atom\_sites\_solution\_primary . Please Do !  
PLAT899\_ALERT\_4\_G SHELXL2018 is Deprecated and Succeeded by SHELXL 2019/3 Note  
PLAT941\_ALERT\_3\_G Average HKL Measurement Multiplicity ..... 2.1 Low  
PLAT950\_ALERT\_5\_G Calculated (ThMax) and CIF-Reported Hmax Differ 3 Units

---

0 **ALERT level A** = Most likely a serious problem - resolve or explain  
5 **ALERT level B** = A potentially serious problem, consider carefully  
39 **ALERT level C** = Check. Ensure it is not caused by an omission or oversight  
49 **ALERT level G** = General information/check it is not something unexpected

6 ALERT type 1 CIF construction/syntax error, inconsistent or missing data  
50 ALERT type 2 Indicator that the structure model may be wrong or deficient  
6 ALERT type 3 Indicator that the structure quality may be low  
26 ALERT type 4 Improvement, methodology, query or suggestion  
5 ALERT type 5 Informative message, check

---

It is advisable to attempt to resolve as many as possible of the alerts in all categories. Often the minor alerts point to easily fixed oversights, errors and omissions in your CIF or refinement strategy, so attention to these fine details can be worthwhile. In order to resolve some of the more serious problems it may be necessary to carry out additional measurements or structure refinements. However, the purpose of your study may justify the reported deviations and the more serious of these should normally be commented upon in the discussion or experimental section of a paper or in the "special\_details" fields of the CIF. checkCIF was carefully designed to identify outliers and unusual parameters, but every test has its limitations and alerts that are not important in a particular case may appear. Conversely, the absence of alerts does not guarantee there are no aspects of the results needing attention. It is up to the individual to critically assess their own results and, if necessary, seek expert advice.

### **Publication of your CIF in IUCr journals**

A basic structural check has been run on your CIF. These basic checks will be run on all CIFs submitted for publication in IUCr journals (*Acta Crystallographica*, *Journal of Applied Crystallography*, *Journal of Synchrotron Radiation*); however, if you intend to submit to *Acta Crystallographica Section C* or *E* or *IUCrData*, you should make sure that full publication checks are run on the final version of your CIF prior to submission.

### **Publication of your CIF in other journals**

Please refer to the *Notes for Authors* of the relevant journal for any special instructions relating to CIF submission.

---

**PLATON version of 13/12/2023; check.def file version of 13/12/2023**

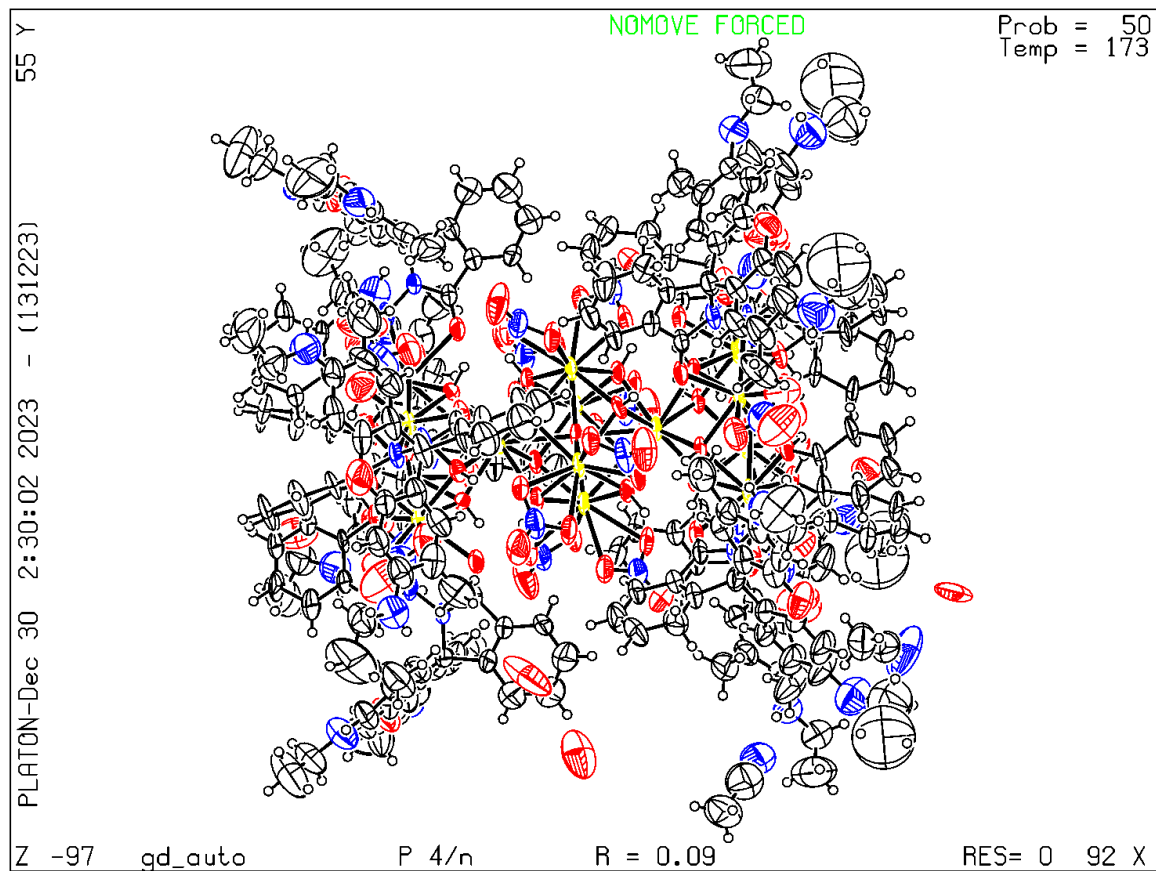

Supplement: Supplementary file 1 [file supplementary]
