# Supplementary material for: {Gd<sup>III</sup><sub>7</sub>} and {Gd<sup>III</sup><sub>14</sub>} Clusters Based on Rhodamine 6G Ligand with Magnetocaloric Effect
Source: Preprints.org preprint supplement (doi:10.20944/preprints202401.0084.v1), 2024-01-03

## checkCIF/PLATON report

You have not supplied any structure factors. As a result the full set of tests cannot be run.

THIS REPORT IS FOR GUIDANCE ONLY. IF USED AS PART OF A REVIEW PROCEDURE FOR PUBLICATION, IT SHOULD NOT REPLACE THE EXPERTISE OF AN EXPERIENCED CRYSTALLOGRAPHIC REFEREE.

No syntax errors found.      CIF dictionary      Interpreting this report

### Datablock: gd7\_auto

---

|                 |                                                                    |                                                                    |
|-----------------|--------------------------------------------------------------------|--------------------------------------------------------------------|
| Bond precision: | C-C = 0.0239 A                                                     | Wavelength=1.54184                                                 |
| Cell:           | a=26.4695 (2)                                                      | b=57.9994 (6)      c=52.5818 (6)                                   |
|                 | alpha=90                                                           | beta=98.283 (1)      gamma=90                                      |
| Temperature:    | 100 K                                                              |                                                                    |
|                 | Calculated                                                         | Reported                                                           |
| Volume          | 79882.3 (14)                                                       | 79882.3 (14)                                                       |
| Space group     | P 21/n                                                             | P 1 21/n 1                                                         |
| Hall group      | -P 2yn                                                             | -P 2yn                                                             |
| Moiety formula  | C206 H213 Gd7 N26 O36,<br>2 (C206 H210 Gd7 N26 O36) [+<br>solvent] | (C206 H214 Gd7 N26 O36),<br>[NO3], 10[CH3OH],<br>10[CH3CN], 2[H2O] |
| Sum formula     | C618 H633 Gd21 N78 O108 [+<br>solvent]                             | C236 H288 Gd7 N37 O51                                              |
| Mr              | 14183.14                                                           | 5559.77                                                            |
| Dx, g cm-3      | 1.179                                                              | 1.387                                                              |
| Z               | 4                                                                  | 12                                                                 |
| Mu (mm-1)       | 11.553                                                             | 11.692                                                             |
| F000            | 28380.0                                                            | 33828.0                                                            |
| F000'           | 27726.16                                                           |                                                                    |
| h, k, lmax      | 31, 68, 61                                                         | 31, 67, 61                                                         |
| Nref            | 137081                                                             | 133115                                                             |
| Tmin, Tmax      | 0.183, 0.311                                                       | 0.699, 1.000                                                       |
| Tmin'           | 0.064                                                              |                                                                    |

Correction method= # Reported T Limits: Tmin=0.699 Tmax=1.000  
AbsCorr = MULTII-SCAN

Data completeness= 0.971

Theta(max)= 65.349

R(reflections)= 0.1210( 86336)

wR2(reflections)=  
0.3341(133115)

S = 1.073

Npar= 7410

---

The following ALERTS were generated. Each ALERT has the format

**test-name\_ALERT\_alert-type\_alert-level.**

Click on the hyperlinks for more details of the test.

---

#### Alert level A

PLAT241\_ALERT\_2\_A High 'MainMol' Ueq as Compared to Neighbors of N36 Check

**Author Response: The single crystal X-ray diffraction data of the complex is not very good. The atom assignment is correct.**

---

#### Alert level B

PLAT220\_ALERT\_2\_B NonSolvent Resd 1 C Ueq(max)/Ueq(min) Range 6.6 Ratio

**Author Response: The single crystal X-ray diffraction data of the complex is not very good, leading to the Ueq(max)/Ueq(min) Range.**

PLAT220\_ALERT\_2\_B NonSolvent Resd 1 O Ueq(max)/Ueq(min) Range 10.0 Ratio

**Author Response: The single crystal X-ray diffraction data of the complex is not very good, leading to the Ueq(max)/Ueq(min) Range.**

PLAT220\_ALERT\_2\_B NonSolvent Resd 2 N Ueq(max)/Ueq(min) Range 7.9 Ratio

**Author Response: The single crystal X-ray diffraction data of the complex is not very good, leading to the Ueq(max)/Ueq(min) Range.**

PLAT220\_ALERT\_2\_B NonSolvent Resd 3 C Ueq(max)/Ueq(min) Range 7.6 Ratio

**Author Response: The single crystal X-ray diffraction data of the complex is not very good, leading to the Ueq(max)/Ueq(min) Range.**

PLAT241\_ALERT\_2\_B High 'MainMol' Ueq as Compared to Neighbors of N5 Check

**Author Response: The single crystal X-ray diffraction data of the complex is not very good. The atom assignment is correct.**

PLAT241\_ALERT\_2\_B High 'MainMol' Ueq as Compared to Neighbors of C194 Check

**Author Response: The single crystal X-ray diffraction data of the complex is not very good. The atom assignment is correct.**

PLAT241\_ALERT\_2\_B High 'MainMol' Ueq as Compared to Neighbors of C270 Check

**Author Response: The single crystal X-ray diffraction data of the complex is not very good. The atom assignment is correct.**

PLAT241\_ALERT\_2\_B High 'MainMol' Ueq as Compared to Neighbors of C507 Check

**Author Response: The single crystal X-ray diffraction data of the complex is not very good. The atom assignment is correct.**

PLAT241\_ALERT\_2\_B High 'MainMol' Ueq as Compared to Neighbors of C540 Check

**Author Response: The single crystal X-ray diffraction data of the complex is not very good. The atom assignment is correct.**

PLAT242\_ALERT\_2\_B Low 'MainMol' Ueq as Compared to Neighbors of C240 Check

**Author Response: The single crystal X-ray diffraction data of the complex is not very good. The atom assignment is correct.**

PLAT242\_ALERT\_2\_B Low 'MainMol' Ueq as Compared to Neighbors of C267 Check

**Author Response: The single crystal X-ray diffraction data of the complex is not very good. The atom assignment is correct.**

PLAT242\_ALERT\_2\_B Low 'MainMol' Ueq as Compared to Neighbors of C268 Check

**Author Response: The single crystal X-ray diffraction data of the complex is not very good. The atom assignment is correct.**

PLAT342\_ALERT\_3\_B Low Bond Precision on C-C Bonds ..... 0.02395 Ang.

**Author Response: The single crystal X-ray diffraction data of the complex is not very good, resulting in Low Bond Precision.**

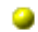

**Alert level C**

THETM01\_ALERT\_3\_C The value of  $\sin(\theta_{\max})/\lambda$  is less than 0.590

Calculated sin(theta\_max)/wavelength = 0.5895

|                                                                   |       |        |
|-------------------------------------------------------------------|-------|--------|
| PLAT029_ALERT_3_C _diffn_measured_fraction_theta_full value Low . | 0.971 | Why?   |
| PLAT082_ALERT_2_C High R1 Value .....                             | 0.12  | Report |
| PLAT084_ALERT_3_C High wR2 Value (i.e. > 0.25) .....              | 0.33  | Report |
| PLAT218_ALERT_3_C Constrained U(ij) Components(s) for Gd1 .       | 6     | Check  |
| PLAT218_ALERT_3_C Constrained U(ij) Components(s) for Gd2 .       | 6     | Check  |
| PLAT218_ALERT_3_C Constrained U(ij) Components(s) for Gd3 .       | 6     | Check  |
| PLAT218_ALERT_3_C Constrained U(ij) Components(s) for Gd4 .       | 6     | Check  |
| PLAT218_ALERT_3_C Constrained U(ij) Components(s) for Gd5 .       | 6     | Check  |
| PLAT218_ALERT_3_C Constrained U(ij) Components(s) for Gd6 .       | 6     | Check  |
| PLAT218_ALERT_3_C Constrained U(ij) Components(s) for Gd7 .       | 6     | Check  |
| PLAT218_ALERT_3_C Constrained U(ij) Components(s) for O2 .        | 6     | Check  |
| PLAT218_ALERT_3_C Constrained U(ij) Components(s) for O1 .        | 6     | Check  |
| PLAT218_ALERT_3_C Constrained U(ij) Components(s) for O3 .        | 6     | Check  |
| PLAT218_ALERT_3_C Constrained U(ij) Components(s) for O5 .        | 6     | Check  |
| PLAT218_ALERT_3_C Constrained U(ij) Components(s) for N19 .       | 6     | Check  |
| PLAT218_ALERT_3_C Constrained U(ij) Components(s) for C181 .      | 6     | Check  |
| PLAT218_ALERT_3_C Constrained U(ij) Components(s) for N16 .       | 6     | Check  |
| PLAT218_ALERT_3_C Constrained U(ij) Components(s) for N11 .       | 6     | Check  |
| PLAT218_ALERT_3_C Constrained U(ij) Components(s) for N2 .        | 6     | Check  |
| PLAT218_ALERT_3_C Constrained U(ij) Components(s) for C82 .       | 6     | Check  |
| PLAT218_ALERT_3_C Constrained U(ij) Components(s) for N15 .       | 6     | Check  |
| PLAT218_ALERT_3_C Constrained U(ij) Components(s) for N24 .       | 6     | Check  |
| PLAT218_ALERT_3_C Constrained U(ij) Components(s) for C81 .       | 6     | Check  |
| PLAT218_ALERT_3_C Constrained U(ij) Components(s) for C90 .       | 6     | Check  |
| PLAT218_ALERT_3_C Constrained U(ij) Components(s) for C51 .       | 6     | Check  |
| PLAT218_ALERT_3_C Constrained U(ij) Components(s) for C75 .       | 6     | Check  |
| PLAT218_ALERT_3_C Constrained U(ij) Components(s) for C495 .      | 6     | Check  |
| PLAT218_ALERT_3_C Constrained U(ij) Components(s) for C434 .      | 6     | Check  |
| PLAT218_ALERT_3_C Constrained U(ij) Components(s) for O27 .       | 6     | Check  |
| PLAT218_ALERT_3_C Constrained U(ij) Components(s) for C387 .      | 6     | Check  |
| PLAT218_ALERT_3_C Constrained U(ij) Components(s) for C177 .      | 6     | Check  |
| PLAT218_ALERT_3_C Constrained U(ij) Components(s) for C83 .       | 6     | Check  |
| PLAT218_ALERT_3_C Constrained U(ij) Components(s) for C48 .       | 6     | Check  |
| PLAT218_ALERT_3_C Constrained U(ij) Components(s) for C49 .       | 6     | Check  |
| PLAT218_ALERT_3_C Constrained U(ij) Components(s) for C16 .       | 6     | Check  |
| PLAT218_ALERT_3_C Constrained U(ij) Components(s) for C55 .       | 6     | Check  |
| PLAT218_ALERT_3_C Constrained U(ij) Components(s) for N10 .       | 6     | Check  |
| PLAT218_ALERT_3_C Constrained U(ij) Components(s) for C176 .      | 6     | Check  |
| PLAT218_ALERT_3_C Constrained U(ij) Components(s) for O17 .       | 6     | Check  |
| PLAT218_ALERT_3_C Constrained U(ij) Components(s) for C56 .       | 6     | Check  |
| PLAT218_ALERT_3_C Constrained U(ij) Components(s) for O33 .       | 6     | Check  |
| PLAT218_ALERT_3_C Constrained U(ij) Components(s) for C174 .      | 6     | Check  |
| PLAT218_ALERT_3_C Constrained U(ij) Components(s) for C57 .       | 6     | Check  |
| PLAT218_ALERT_3_C Constrained U(ij) Components(s) for C10 .       | 6     | Check  |
| PLAT218_ALERT_3_C Constrained U(ij) Components(s) for C3 .        | 6     | Check  |
| PLAT218_ALERT_3_C Constrained U(ij) Components(s) for C116 .      | 6     | Check  |
| PLAT218_ALERT_3_C Constrained U(ij) Components(s) for C113 .      | 6     | Check  |
| PLAT218_ALERT_3_C Constrained U(ij) Components(s) for N4 .        | 6     | Check  |
| PLAT218_ALERT_3_C Constrained U(ij) Components(s) for C50 .       | 6     | Check  |
| PLAT218_ALERT_3_C Constrained U(ij) Components(s) for C65 .       | 6     | Check  |
| PLAT218_ALERT_3_C Constrained U(ij) Components(s) for C79 .       | 6     | Check  |
| PLAT218_ALERT_3_C Constrained U(ij) Components(s) for O30 .       | 6     | Check  |
| PLAT218_ALERT_3_C Constrained U(ij) Components(s) for O14 .       | 6     | Check  |
| PLAT218_ALERT_3_C Constrained U(ij) Components(s) for C121 .      | 6     | Check  |
| PLAT218_ALERT_3_C Constrained U(ij) Components(s) for C120 .      | 6     | Check  |
| PLAT218_ALERT_3_C Constrained U(ij) Components(s) for C41 .       | 6     | Check  |

[illegible]

[illegible]

[illegible]

[illegible]



[illegible]

[illegible]

[illegible]

[illegible]

[illegible]

[illegible]

[illegible]

[illegible]



[illegible]

|                   |                   |                                  |   |     |       |
|-------------------|-------------------|----------------------------------|---|-----|-------|
| PLAT218_ALERT_3_C | Constrained U(ij) | Components (s) for C581          | . | 6   | Check |
| PLAT218_ALERT_3_C | Constrained U(ij) | Components (s) for C481          | . | 6   | Check |
| PLAT218_ALERT_3_C | Constrained U(ij) | Components (s) for C547          | . | 6   | Check |
| PLAT218_ALERT_3_C | Constrained U(ij) | Components (s) for C574          | . | 6   | Check |
| PLAT218_ALERT_3_C | Constrained U(ij) | Components (s) for C482          | . | 6   | Check |
| PLAT218_ALERT_3_C | Constrained U(ij) | Components (s) for C607          | . | 6   | Check |
| PLAT218_ALERT_3_C | Constrained U(ij) | Components (s) for O105          | . | 6   | Check |
| PLAT218_ALERT_3_C | Constrained U(ij) | Components (s) for C276          | . | 6   | Check |
| PLAT218_ALERT_3_C | Constrained U(ij) | Components (s) for N31           | . | 6   | Check |
| PLAT218_ALERT_3_C | Constrained U(ij) | Components (s) for C161          | . | 6   | Check |
| PLAT218_ALERT_3_C | Constrained U(ij) | Components (s) for C240          | . | 6   | Check |
| PLAT218_ALERT_3_C | Constrained U(ij) | Components (s) for C30           | . | 6   | Check |
| PLAT218_ALERT_3_C | Constrained U(ij) | Components (s) for C29           | . | 6   | Check |
| PLAT218_ALERT_3_C | Constrained U(ij) | Components (s) for C242          | . | 6   | Check |
| PLAT218_ALERT_3_C | Constrained U(ij) | Components (s) for C95           | . | 6   | Check |
| PLAT218_ALERT_3_C | Constrained U(ij) | Components (s) for C267          | . | 6   | Check |
| PLAT218_ALERT_3_C | Constrained U(ij) | Components (s) for N143          | . | 6   | Check |
| PLAT218_ALERT_3_C | Constrained U(ij) | Components (s) for C268          | . | 6   | Check |
| PLAT218_ALERT_3_C | Constrained U(ij) | Components (s) for C508          | . | 6   | Check |
| PLAT218_ALERT_3_C | Constrained U(ij) | Components (s) for C168          | . | 6   | Check |
| PLAT218_ALERT_3_C | Constrained U(ij) | Components (s) for C408          | . | 6   | Check |
| PLAT218_ALERT_3_C | Constrained U(ij) | Components (s) for C96           | . | 6   | Check |
| PLAT218_ALERT_3_C | Constrained U(ij) | Components (s) for C169          | . | 6   | Check |
| PLAT218_ALERT_3_C | Constrained U(ij) | Components (s) for C195          | . | 6   | Check |
| PLAT218_ALERT_3_C | Constrained U(ij) | Components (s) for C235          | . | 6   | Check |
| PLAT218_ALERT_3_C | Constrained U(ij) | Components (s) for C162          | . | 6   | Check |
| PLAT218_ALERT_3_C | Constrained U(ij) | Components (s) for C204          | . | 6   | Check |
| PLAT218_ALERT_3_C | Constrained U(ij) | Components (s) for C700          | . | 6   | Check |
| PLAT218_ALERT_3_C | Constrained U(ij) | Components (s) for C702          | . | 6   | Check |
| PLAT218_ALERT_3_C | Constrained U(ij) | Components (s) for C701          | . | 6   | Check |
| PLAT218_ALERT_3_C | Constrained U(ij) | Components (s) for C269          | . | 6   | Check |
| PLAT220_ALERT_2_C | NonSolvent        | Resd 1 N Ueq(max)/Ueq(min) Range |   | 3.8 | Ratio |

**Author Response: The single crystal X-ray diffraction data of the complex is not very good, leading to the Ueq(max)/Ueq(min) Range.**

|                   |            |                                  |  |     |       |
|-------------------|------------|----------------------------------|--|-----|-------|
| PLAT220_ALERT_2_C | NonSolvent | Resd 2 C Ueq(max)/Ueq(min) Range |  | 5.8 | Ratio |
|-------------------|------------|----------------------------------|--|-----|-------|

**Author Response: The single crystal X-ray diffraction data of the complex is not very good, leading to the Ueq(max)/Ueq(min) Range.**

|                   |            |                                  |  |     |       |
|-------------------|------------|----------------------------------|--|-----|-------|
| PLAT220_ALERT_2_C | NonSolvent | Resd 2 O Ueq(max)/Ueq(min) Range |  | 5.4 | Ratio |
|-------------------|------------|----------------------------------|--|-----|-------|

**Author Response: The single crystal X-ray diffraction data of the complex is not very good, leading to the Ueq(max)/Ueq(min) Range.**

|                   |            |                                  |  |     |       |
|-------------------|------------|----------------------------------|--|-----|-------|
| PLAT220_ALERT_2_C | NonSolvent | Resd 3 N Ueq(max)/Ueq(min) Range |  | 3.7 | Ratio |
|-------------------|------------|----------------------------------|--|-----|-------|

**Author Response: The single crystal X-ray diffraction data of the complex is not very good, leading to the Ueq(max)/Ueq(min) Range.**

PLAT220\_ALERT\_2\_C NonSolvent Resd 3 O Ueq(max)/Ueq(min) Range 3.4 Ratio

**Author Response: The single crystal X-ray diffraction data of the complex is not very good, leading to the Ueq(max)/Ueq(min) Range.**

PLAT222\_ALERT\_3\_C NonSolvent Resd 1 H Uiso(max)/Uiso(min) Range 8.4 Ratio  
PLAT222\_ALERT\_3\_C NonSolvent Resd 2 H Uiso(max)/Uiso(min) Range 6.7 Ratio  
PLAT222\_ALERT\_3\_C NonSolvent Resd 3 H Uiso(max)/Uiso(min) Range 7.7 Ratio  
PLAT241\_ALERT\_2\_C High 'MainMol' Ueq as Compared to Neighbors of O30 Check

**Author Response: The single crystal X-ray diffraction data of the complex is not very good. The atom assignment is correct.**

PLAT241\_ALERT\_2\_C High 'MainMol' Ueq as Compared to Neighbors of N13 Check

**Author Response: The single crystal X-ray diffraction data of the complex is not very good. The atom assignment is correct.**

PLAT241\_ALERT\_2\_C High 'MainMol' Ueq as Compared to Neighbors of N21 Check

**Author Response: The single crystal X-ray diffraction data of the complex is not very good. The atom assignment is correct.**

PLAT241\_ALERT\_2\_C High 'MainMol' Ueq as Compared to Neighbors of N22 Check

**Author Response: The single crystal X-ray diffraction data of the complex is not very good. The atom assignment is correct.**

PLAT241\_ALERT\_2\_C High 'MainMol' Ueq as Compared to Neighbors of C12 Check

**Author Response: The single crystal X-ray diffraction data of the complex is not very good. The atom assignment is correct.**

PLAT241\_ALERT\_2\_C High 'MainMol' Ueq as Compared to Neighbors of C21 Check

**Author Response: The single crystal X-ray diffraction data of the complex is not very good. The atom assignment is correct.**

PLAT241\_ALERT\_2\_C High 'MainMol' Ueq as Compared to Neighbors of C31 Check

**Author Response: The single crystal X-ray diffraction data of the complex is not very good. The atom assignment is correct.**

PLAT241\_ALERT\_2\_C High 'MainMol' Ueq as Compared to Neighbors of C33 Check

**Author Response: The single crystal X-ray diffraction data of the complex is not very good. The atom assignment is correct.**

PLAT241\_ALERT\_2\_C High 'MainMol' Ueq as Compared to Neighbors of C35 Check

**Author Response: The single crystal X-ray diffraction data of the complex is not very good. The atom assignment is correct.**

PLAT241\_ALERT\_2\_C High 'MainMol' Ueq as Compared to Neighbors of C40 Check

**Author Response: The single crystal X-ray diffraction data of the complex is not very good. The atom assignment is correct.**

PLAT241\_ALERT\_2\_C High 'MainMol' Ueq as Compared to Neighbors of C62 Check

**Author Response: The single crystal X-ray diffraction data of the complex is not very good. The atom assignment is correct.**

PLAT241\_ALERT\_2\_C High 'MainMol' Ueq as Compared to Neighbors of C166 Check

**Author Response: The single crystal X-ray diffraction data of the complex is not very good. The atom assignment is correct.**

PLAT241\_ALERT\_2\_C High 'MainMol' Ueq as Compared to Neighbors of O57 Check

**Author Response: The single crystal X-ray diffraction data of the complex is not very good. The atom assignment is correct.**

PLAT241\_ALERT\_2\_C High 'MainMol' Ueq as Compared to Neighbors of C218 Check

**Author Response: The single crystal X-ray diffraction data of the complex is not very good. The atom assignment is correct.**

PLAT241\_ALERT\_2\_C High 'MainMol' Ueq as Compared to Neighbors of C232 Check

**Author Response: The single crystal X-ray diffraction data of the complex is not very good. The atom assignment is correct.**

PLAT241\_ALERT\_2\_C High 'MainMol' Ueq as Compared to Neighbors of C234 Check

**Author Response: The single crystal X-ray diffraction data of the complex is not very good. The atom assignment is correct.**

PLAT241\_ALERT\_2\_C High 'MainMol' Ueq as Compared to Neighbors of C239 Check

**Author Response: The single crystal X-ray diffraction data of the complex is not very good. The atom assignment is correct.**

PLAT241\_ALERT\_2\_C High 'MainMol' Ueq as Compared to Neighbors of C241 Check

**Author Response: The single crystal X-ray diffraction data of the complex is not very good. The atom assignment is correct.**

PLAT241\_ALERT\_2\_C High 'MainMol' Ueq as Compared to Neighbors of C251 Check

**Author Response: The single crystal X-ray diffraction data of the complex is not very good. The atom assignment is correct.**

PLAT241\_ALERT\_2\_C High 'MainMol' Ueq as Compared to Neighbors of C259 Check

**Author Response: The single crystal X-ray diffraction data of the complex is not very good. The atom assignment is correct.**

PLAT241\_ALERT\_2\_C High 'MainMol' Ueq as Compared to Neighbors of C265 Check

**Author Response: The single crystal X-ray diffraction data of the complex is not very good. The atom assignment is correct.**

PLAT241\_ALERT\_2\_C High 'MainMol' Ueq as Compared to Neighbors of C273 Check

**Author Response: The single crystal X-ray diffraction data of the complex is not very good. The atom assignment is correct.**

PLAT241\_ALERT\_2\_C High 'MainMol' Ueq as Compared to Neighbors of C275 Check

**Author Response: The single crystal X-ray diffraction data of the complex is not very good. The atom assignment is correct.**

PLAT241\_ALERT\_2\_C High 'MainMol' Ueq as Compared to Neighbors of C317 Check

**Author Response: The single crystal X-ray diffraction data of the complex is not very good. The atom assignment is correct.**

PLAT241\_ALERT\_2\_C High 'MainMol' Ueq as Compared to Neighbors of C382 Check

**Author Response: The single crystal X-ray diffraction data of the complex is not very good. The atom assignment is correct.**

PLAT241\_ALERT\_2\_C High 'MainMol' Ueq as Compared to Neighbors of C407 Check

**Author Response: The single crystal X-ray diffraction data of the complex is not very good. The atom assignment is correct.**

PLAT241\_ALERT\_2\_C High 'MainMol' Ueq as Compared to Neighbors of O105 Check

**Author Response: The single crystal X-ray diffraction data of the complex is not very good. The atom assignment is correct.**

PLAT241\_ALERT\_2\_C High 'MainMol' Ueq as Compared to Neighbors of C489 Check

**Author Response: The single crystal X-ray diffraction data of the complex is not very good. The atom assignment is correct.**

PLAT241\_ALERT\_2\_C High 'MainMol' Ueq as Compared to Neighbors of C523 Check

**Author Response: The single crystal X-ray diffraction data of the complex is not very good. The atom assignment is correct.**

PLAT241\_ALERT\_2\_C High 'MainMol' Ueq as Compared to Neighbors of C578 Check

**Author Response: The single crystal X-ray diffraction data of the complex is not very good. The atom assignment is correct.**

PLAT242\_ALERT\_2\_C Low 'MainMol' Ueq as Compared to Neighbors of O8 Check

**Author Response: The single crystal X-ray diffraction data of the complex is not very good. The atom assignment is correct.**

PLAT242\_ALERT\_2\_C Low 'MainMol' Ueq as Compared to Neighbors of N9 Check

**Author Response: The single crystal X-ray diffraction data of the complex is not very good. The atom assignment is correct.**

PLAT242\_ALERT\_2\_C Low 'MainMol' Ueq as Compared to Neighbors of N18 Check

**Author Response: The single crystal X-ray diffraction data of the complex is not very good. The atom assignment is correct.**

PLAT242\_ALERT\_2\_C Low 'MainMol' Ueq as Compared to Neighbors of N25 Check

**Author Response: The single crystal X-ray diffraction data of the complex is not very good. The atom assignment is correct.**

PLAT242\_ALERT\_2\_C Low 'MainMol' Ueq as Compared to Neighbors of C28 Check

**Author Response: The single crystal X-ray diffraction data of the complex is not very good. The atom assignment is correct.**

PLAT242\_ALERT\_2\_C Low 'MainMol' Ueq as Compared to Neighbors of C29 Check

**Author Response: The single crystal X-ray diffraction data of the complex is not very good. The atom assignment is correct.**

PLAT242\_ALERT\_2\_C Low 'MainMol' Ueq as Compared to Neighbors of C34 Check

**Author Response: The single crystal X-ray diffraction data of the complex is not very good. The atom assignment is correct.**

PLAT242\_ALERT\_2\_C Low 'MainMol' Ueq as Compared to Neighbors of C38 Check

**Author Response: The single crystal X-ray diffraction data of the complex is not very good. The atom assignment is correct.**

PLAT242\_ALERT\_2\_C Low 'MainMol' Ueq as Compared to Neighbors of C95 Check

**Author Response: The single crystal X-ray diffraction data of the complex is not very good. The atom assignment is correct.**

PLAT242\_ALERT\_2\_C Low 'MainMol' Ueq as Compared to Neighbors of C125 Check

**Author Response: The single crystal X-ray diffraction data of the complex is not very good. The atom assignment is correct.**

PLAT242\_ALERT\_2\_C Low 'MainMol' Ueq as Compared to Neighbors of C128 Check

**Author Response: The single crystal X-ray diffraction data of the complex is not very good. The atom assignment is correct.**

PLAT242\_ALERT\_2\_C Low 'MainMol' Ueq as Compared to Neighbors of C137 Check

**Author Response: The single crystal X-ray diffraction data of the complex is not very good. The atom assignment is correct.**

PLAT242\_ALERT\_2\_C Low 'MainMol' Ueq as Compared to Neighbors of C161 Check

**Author Response: The single crystal X-ray diffraction data of the complex is not very good. The atom assignment is correct.**

PLAT242\_ALERT\_2\_C Low 'MainMol' Ueq as Compared to Neighbors of C168 Check

**Author Response: The single crystal X-ray diffraction data of the complex is not very good. The atom assignment is correct.**

PLAT242\_ALERT\_2\_C Low 'MainMol' Ueq as Compared to Neighbors of C201 Check

**Author Response: The single crystal X-ray diffraction data of the complex is not very good. The atom assignment is correct.**

PLAT242\_ALERT\_2\_C Low 'MainMol' Ueq as Compared to Neighbors of O60 Check

**Author Response: The single crystal X-ray diffraction data of the complex is not very good. The atom assignment is correct.**

PLAT242\_ALERT\_2\_C Low 'MainMol' Ueq as Compared to Neighbors of N31 Check

**Author Response: The single crystal X-ray diffraction data of the complex is not very good. The atom assignment is correct.**

PLAT242\_ALERT\_2\_C Low 'MainMol' Ueq as Compared to Neighbors of N143 Check

**Author Response: The single crystal X-ray diffraction data of the complex is not very good. The atom assignment is correct.**

PLAT242\_ALERT\_2\_C Low 'MainMol' Ueq as Compared to Neighbors of C231 Check

**Author Response: The single crystal X-ray diffraction data of the complex is not very good. The atom assignment is correct.**

PLAT242\_ALERT\_2\_C Low 'MainMol' Ueq as Compared to Neighbors of C247 Check



**Author Response: The single crystal X-ray diffraction data of the complex is not very good. The atom assignment is correct.**

PLAT242\_ALERT\_2\_C Low 'MainMol' Ueq as Compared to Neighbors of C301 Check

**Author Response: The single crystal X-ray diffraction data of the complex is not very good. The atom assignment is correct.**

PLAT242\_ALERT\_2\_C Low 'MainMol' Ueq as Compared to Neighbors of C403 Check

**Author Response: The single crystal X-ray diffraction data of the complex is not very good. The atom assignment is correct.**

PLAT242\_ALERT\_2\_C Low 'MainMol' Ueq as Compared to Neighbors of N65 Check

**Author Response: The single crystal X-ray diffraction data of the complex is not very good. The atom assignment is correct.**

PLAT242\_ALERT\_2\_C Low 'MainMol' Ueq as Compared to Neighbors of N70 Check

**Author Response: The single crystal X-ray diffraction data of the complex is not very good. The atom assignment is correct.**

PLAT242\_ALERT\_2\_C Low 'MainMol' Ueq as Compared to Neighbors of C516 Check

**Author Response: The single crystal X-ray diffraction data of the complex is not very good. The atom assignment is correct.**

PLAT242\_ALERT\_2\_C Low 'MainMol' Ueq as Compared to Neighbors of C580 Check

**Author Response: The single crystal X-ray diffraction data of the complex is not very good. The atom assignment is correct.**

PLAT242\_ALERT\_2\_C Low 'MainMol' Ueq as Compared to Neighbors of C606 Check

**Author Response: The single crystal X-ray diffraction data of the complex is not very good. The atom assignment is correct.**

|                   |       |                     |      |       |   |           |
|-------------------|-------|---------------------|------|-------|---|-----------|
| PLAT334_ALERT_2_C | Small | <C-C> Benzene Dist. | C24  | -C32  | . | 1.37 Ang. |
| PLAT334_ALERT_2_C | Small | <C-C> Benzene Dist. | C90  | -C98  | . | 1.37 Ang. |
| PLAT334_ALERT_2_C | Small | <C-C> Benzene Dist. | C230 | -C238 | . | 1.35 Ang. |
| PLAT334_ALERT_2_C | Small | <C-C> Benzene Dist. | C239 | -C247 | . | 1.35 Ang. |
| PLAT360_ALERT_2_C | Short | C(sp3)-C(sp3) Bond  | C29  | -C30  | . | 1.43 Ang. |
| PLAT360_ALERT_2_C | Short | C(sp3)-C(sp3) Bond  | C162 | -C194 | . | 1.43 Ang. |
| PLAT360_ALERT_2_C | Short | C(sp3)-C(sp3) Bond  | C201 | -C202 | . | 1.35 Ang. |

|                   |       |                     |      |               |   |             |
|-------------------|-------|---------------------|------|---------------|---|-------------|
| PLAT360_ALERT_2_C | Short | C(sp3)-C(sp3) Bond  | C275 | - C276        | . | 1.39 Ang.   |
| PLAT360_ALERT_2_C | Short | C(sp3)-C(sp3) Bond  | C700 | - C701        | . | 1.42 Ang.   |
| PLAT360_ALERT_2_C | Short | C(sp3)-C(sp3) Bond  | C474 | - C475        | . | 1.36 Ang.   |
| PLAT360_ALERT_2_C | Short | C(sp3)-C(sp3) Bond  | C507 | - C508        | . | 1.41 Ang.   |
| PLAT361_ALERT_2_C | Long  | C(sp3)-C(sp3) Bond  | C36  | - C37         | . | 1.67 Ang.   |
| PLAT361_ALERT_2_C | Long  | C(sp3)-C(sp3) Bond  | C95  | - C96         | . | 1.66 Ang.   |
| PLAT362_ALERT_2_C | Short | C(sp3)-C(sp2) Bond  | C18  | - C19         | . | 1.39 Ang.   |
| PLAT362_ALERT_2_C | Short | C(sp3)-C(sp2) Bond  | C23  | - C24         | . | 1.40 Ang.   |
| PLAT368_ALERT_2_C | Short | C(sp2)-C(sp2) Bond  | C232 | - C234        | . | 1.23 Ang.   |
| PLAT369_ALERT_2_C | Long  | C(sp2)-C(sp2) Bond  | C24  | - C32         | . | 1.53 Ang.   |
| PLAT410_ALERT_2_C | Short | Intra H...H Contact | H18A | ..H183        | . | 1.96 Ang.   |
|                   |       |                     |      | x,y,z =       |   | 1_555 Check |
| PLAT410_ALERT_2_C | Short | Intra H...H Contact | H57D | ..H575        | . | 1.96 Ang.   |
|                   |       |                     |      | x,y,z =       |   | 1_555 Check |
| PLAT413_ALERT_2_C | Short | Inter XH3 .. XHn    | H43B | ..H70D        | . | 2.07 Ang.   |
|                   |       |                     |      | 1-x,1-y,1-z = |   | 3_666 Check |
| PLAT413_ALERT_2_C | Short | Inter XH3 .. XHn    | H43B | ..H70I        | . | 2.03 Ang.   |
|                   |       |                     |      | 1-x,1-y,1-z = |   | 3_666 Check |
| PLAT414_ALERT_2_C | Short | Intra D-H..H-X      | H5E  | ..H27C        | . | 1.98 Ang.   |
|                   |       |                     |      | x,y,z =       |   | 1_555 Check |
| PLAT414_ALERT_2_C | Short | Intra D-H..H-X      | H9   | ..H60A        | . | 1.91 Ang.   |
|                   |       |                     |      | x,y,z =       |   | 1_555 Check |
| PLAT414_ALERT_2_C | Short | Intra D-H..H-X      | H10B | ..H14         | . | 1.93 Ang.   |
|                   |       |                     |      | x,y,z =       |   | 1_555 Check |
| PLAT414_ALERT_2_C | Short | Intra D-H..H-X      | H13A | ..H93A        | . | 1.96 Ang.   |
|                   |       |                     |      | x,y,z =       |   | 1_555 Check |
| PLAT414_ALERT_2_C | Short | Intra D-H..H-X      | H15A | ..H22         | . | 1.92 Ang.   |
|                   |       |                     |      | x,y,z =       |   | 1_555 Check |
| PLAT414_ALERT_2_C | Short | Intra D-H..H-X      | H27D | ..H35         | . | 1.93 Ang.   |
|                   |       |                     |      | x,y,z =       |   | 1_555 Check |
| PLAT414_ALERT_2_C | Short | Intra D-H..H-X      | H29C | ..H40A        | . | 1.90 Ang.   |
|                   |       |                     |      | x,y,z =       |   | 1_555 Check |
| PLAT414_ALERT_2_C | Short | Intra D-H..H-X      | H33A | ..H43D        | . | 1.92 Ang.   |
|                   |       |                     |      | x,y,z =       |   | 1_555 Check |
| PLAT414_ALERT_2_C | Short | Intra D-H..H-X      | H36H | ..H48I        | . | 1.93 Ang.   |
|                   |       |                     |      | x,y,z =       |   | 1_555 Check |
| PLAT414_ALERT_2_C | Short | Intra D-H..H-X      | H37D | ..H47         | . | 1.94 Ang.   |
|                   |       |                     |      | x,y,z =       |   | 1_555 Check |
| PLAT414_ALERT_2_C | Short | Intra D-H..H-X      | H39D | ..H51I        | . | 1.91 Ang.   |
|                   |       |                     |      | x,y,z =       |   | 1_555 Check |
| PLAT414_ALERT_2_C | Short | Intra D-H..H-X      | H41V | ..H52A        | . | 1.97 Ang.   |
|                   |       |                     |      | x,y,z =       |   | 1_555 Check |
| PLAT414_ALERT_2_C | Short | Intra D-H..H-X      | H43A | ..H57         | . | 1.93 Ang.   |
|                   |       |                     |      | x,y,z =       |   | 1_555 Check |
| PLAT414_ALERT_2_C | Short | Intra D-H..H-X      | H45A | ..H58D        | . | 1.93 Ang.   |
|                   |       |                     |      | x,y,z =       |   | 1_555 Check |
| PLAT414_ALERT_2_C | Short | Intra D-H..H-X      | H47A | ..H62         | . | 1.91 Ang.   |
|                   |       |                     |      | x,y,z =       |   | 1_555 Check |
| PLAT414_ALERT_2_C | Short | Intra D-H..H-X      | H48A | ..H61         | . | 1.95 Ang.   |
|                   |       |                     |      | x,y,z =       |   | 1_555 Check |
| PLAT414_ALERT_2_C | Short | Intra D-H..H-X      | H50A | ..H65         | . | 1.96 Ang.   |
|                   |       |                     |      | x,y,z =       |   | 1_555 Check |
| PLAT414_ALERT_2_C | Short | Intra D-H..H-X      | H51D | ..H66         | . | 1.95 Ang.   |
|                   |       |                     |      | x,y,z =       |   | 1_555 Check |
| PLAT414_ALERT_2_C | Short | Intra D-H..H-X      | H53A | ..H70         | . | 1.95 Ang.   |
|                   |       |                     |      | x,y,z =       |   | 1_555 Check |
| PLAT414_ALERT_2_C | Short | Intra D-H..H-X      | H55A | ..H69         | . | 1.96 Ang.   |

|                   |                           |      |         |                |
|-------------------|---------------------------|------|---------|----------------|
| PLAT414_ALERT_2_C | Short Intra D-H..H-X      | H58A | x,y,z = | 1_555 Check    |
|                   |                           |      | ..H74   | . 1.94 Ang.    |
| PLAT414_ALERT_2_C | Short Intra D-H..H-X      | H60D | x,y,z = | 1_555 Check    |
|                   |                           |      | ..H77A  | . 1.95 Ang.    |
| PLAT414_ALERT_2_C | Short Intra D-H..H-X      | H61C | x,y,z = | 1_555 Check    |
|                   |                           |      | ..H78A  | . 1.94 Ang.    |
|                   |                           |      | x,y,z = | 1_555 Check    |
| PLAT420_ALERT_2_C | D-H Bond Without Acceptor | N5   | --H5D   | . Please Check |
| PLAT420_ALERT_2_C | D-H Bond Without Acceptor | N5   | --H5E   | . Please Check |
| PLAT420_ALERT_2_C | D-H Bond Without Acceptor | N6   | --H6D   | . Please Check |
| PLAT420_ALERT_2_C | D-H Bond Without Acceptor | N6   | --H6E   | . Please Check |
| PLAT420_ALERT_2_C | D-H Bond Without Acceptor | N9   | --H9    | . Please Check |
| PLAT420_ALERT_2_C | D-H Bond Without Acceptor | N10  | --H10   | . Please Check |
| PLAT420_ALERT_2_C | D-H Bond Without Acceptor | N13  | --H13A  | . Please Check |
| PLAT420_ALERT_2_C | D-H Bond Without Acceptor | N14  | --H14   | . Please Check |
| PLAT420_ALERT_2_C | D-H Bond Without Acceptor | N143 | --H14A  | . Please Check |
| PLAT420_ALERT_2_C | D-H Bond Without Acceptor | N17  | --H17   | . Please Check |
| PLAT420_ALERT_2_C | D-H Bond Without Acceptor | N18  | --H18   | . Please Check |
| PLAT420_ALERT_2_C | D-H Bond Without Acceptor | N21  | --H21A  | . Please Check |
| PLAT420_ALERT_2_C | D-H Bond Without Acceptor | N25  | --H25   | . Please Check |
| PLAT420_ALERT_2_C | D-H Bond Without Acceptor | N26  | --H26   | . Please Check |
| PLAT420_ALERT_2_C | D-H Bond Without Acceptor | N31  | --H31D  | . Please Check |
| PLAT420_ALERT_2_C | D-H Bond Without Acceptor | N35  | --H35   | . Please Check |
| PLAT420_ALERT_2_C | D-H Bond Without Acceptor | N36  | --H36   | . Please Check |
| PLAT420_ALERT_2_C | D-H Bond Without Acceptor | N39  | --H39   | . Please Check |
| PLAT420_ALERT_2_C | D-H Bond Without Acceptor | N40  | --H40A  | . Please Check |
| PLAT420_ALERT_2_C | D-H Bond Without Acceptor | N43  | --H43D  | . Please Check |
| PLAT420_ALERT_2_C | D-H Bond Without Acceptor | N44  | --H44K  | . Please Check |
| PLAT420_ALERT_2_C | D-H Bond Without Acceptor | N47  | --H47   | . Please Check |
| PLAT420_ALERT_2_C | D-H Bond Without Acceptor | N48  | --H48I  | . Please Check |
| PLAT420_ALERT_2_C | D-H Bond Without Acceptor | N51  | --H51I  | . Please Check |
| PLAT420_ALERT_2_C | D-H Bond Without Acceptor | N52  | --H52A  | . Please Check |
| PLAT420_ALERT_2_C | D-H Bond Without Acceptor | N57  | --H57   | . Please Check |
| PLAT420_ALERT_2_C | D-H Bond Without Acceptor | N58  | --H58D  | . Please Check |
| PLAT420_ALERT_2_C | D-H Bond Without Acceptor | N61  | --H61   | . Please Check |
| PLAT420_ALERT_2_C | D-H Bond Without Acceptor | N62  | --H62   | . Please Check |
| PLAT420_ALERT_2_C | D-H Bond Without Acceptor | N65  | --H65   | . Please Check |
| PLAT420_ALERT_2_C | D-H Bond Without Acceptor | N66  | --H66   | . Please Check |
| PLAT420_ALERT_2_C | D-H Bond Without Acceptor | N69  | --H69   | . Please Check |
| PLAT420_ALERT_2_C | D-H Bond Without Acceptor | N70  | --H70   | . Please Check |
| PLAT420_ALERT_2_C | D-H Bond Without Acceptor | N73  | --H73A  | . Please Check |
| PLAT420_ALERT_2_C | D-H Bond Without Acceptor | N74  | --H74   | . Please Check |
| PLAT420_ALERT_2_C | D-H Bond Without Acceptor | N77  | --H77A  | . Please Check |
| PLAT420_ALERT_2_C | D-H Bond Without Acceptor | N78  | --H78A  | . Please Check |

## Alert level G

FORMU01\_ALERT\_1\_G There is a discrepancy between the atom counts in the  
     \_chemical\_formula\_sum and \_chemical\_formula\_moiety. This is  
     usually due to the moiety formula being in the wrong format.  
     Atom count from \_chemical\_formula\_sum: C236 H288 Gd7 N37 O51  
     Atom count from \_chemical\_formula\_moiety: C206 H214 Gd7 N26 O36

FORMU01\_ALERT\_2\_G There is a discrepancy between the atom counts in the  
     \_chemical\_formula\_sum and the formula from the \_atom\_site\* data.  
     Atom count from \_chemical\_formula\_sum: C236 H288 Gd7 N37 O51  
     Atom count from the \_atom\_site data: C206 H211 Gd7 N26 O36

CELLZ01\_ALERT\_1\_G Difference between formula and atom\_site contents detected.

CELLZ01\_ALERT\_1\_G ALERT: Large difference may be due to a  
 symmetry error - see SYMMG tests  
 From the CIF: \_cell\_formula\_units\_Z 12  
 From the CIF: \_chemical\_formula\_sum C236 H288 Gd7 N37 O51  
 TEST: Compare cell contents of formula and atom\_site data

| atom | Z*formula | cif sites | diff   |
|------|-----------|-----------|--------|
| C    | 2832.00   | 2472.00   | 360.00 |
| H    | 3456.00   | 2532.00   | 924.00 |
| Gd   | 84.00     | 84.00     | 0.00   |
| N    | 444.00    | 312.00    | 132.00 |
| O    | 612.00    | 432.00    | 180.00 |

|                   |                                                       |         |              |
|-------------------|-------------------------------------------------------|---------|--------------|
| PLAT002_ALERT_2_G | Number of Distance or Angle Restraints on AtSite      | 87      | Note         |
| PLAT003_ALERT_2_G | Number of Uiso or Uij Restrained non-H Atoms ...      | 1       | Report       |
| PLAT007_ALERT_5_G | Number of Unrefined Donor-H Atoms .....               | 38      | Report       |
|                   | H5D H5E H6D H6E H9 H10 H13A H14 H17 H18 H21A          |         |              |
|                   | H22 H25 H26 H14A H31D H35 H36 H39 H40A H43D H44K      |         |              |
| PLAT041_ALERT_1_G | Calc. and Reported SumFormula Strings Differ          |         | Please Check |
|                   | Calc: C206 H211 Gd7 N26 O36                           |         |              |
|                   | Rep.: C236 H288 Gd7 N37 O51                           |         |              |
| PLAT042_ALERT_1_G | Calc. and Reported MoietyFormula Strings Differ       |         | Please Check |
|                   | Calc: C206 H213 Gd7 N26 O36, 2(C206 H210 Gd7 N26 O36) |         |              |
|                   | Rep.: (C206 H214 Gd7 N26 O36),                        |         |              |
| PLAT045_ALERT_1_G | Calculated and Reported Z Differ by a Factor ...      | 0.333   | Check        |
| PLAT051_ALERT_1_G | Mu(calc) and Mu(CIF) Ratio Differs from 1.0 by .      | 1.18    | %            |
| PLAT083_ALERT_2_G | SHELXL Second Parameter in WGHT Unusually Large       | 1077.95 | Why ?        |
| PLAT172_ALERT_4_G | The CIF-Embedded .res File Contains DFIX Records      | 40      | Report       |
| PLAT174_ALERT_4_G | The CIF-Embedded .res File Contains FLAT Records      | 2       | Report       |
| PLAT186_ALERT_4_G | The CIF-Embedded .res File Contains ISOR Records      | 1       | Report       |
| PLAT335_ALERT_2_G | Check Large C6 Ring C-C Range C24 -C32                | 0.27    | Ang.         |
| PLAT335_ALERT_2_G | Check Large C6 Ring C-C Range C33 -C41                | 0.22    | Ang.         |
| PLAT335_ALERT_2_G | Check Large C6 Ring C-C Range C230 -C238              | 0.28    | Ang.         |
| PLAT335_ALERT_2_G | Check Large C6 Ring C-C Range C263 -C271              | 0.19    | Ang.         |
| PLAT343_ALERT_2_G | Unusual sp3 Angle Range in Main Residue for           | C268    | Check        |
| PLAT343_ALERT_2_G | Unusual sp3 Angle Range in Main Residue for           | C700    | Check        |
| PLAT380_ALERT_4_G | Incorrectly? Oriented X(sp2)-Methyl Moiety .....      | C60     | Check        |
| PLAT380_ALERT_4_G | Incorrectly? Oriented X(sp2)-Methyl Moiety .....      | C93     | Check        |
| PLAT380_ALERT_4_G | Incorrectly? Oriented X(sp2)-Methyl Moiety .....      | C105    | Check        |
| PLAT380_ALERT_4_G | Incorrectly? Oriented X(sp2)-Methyl Moiety .....      | C126    | Check        |
| PLAT380_ALERT_4_G | Incorrectly? Oriented X(sp2)-Methyl Moiety .....      | C138    | Check        |
| PLAT380_ALERT_4_G | Incorrectly? Oriented X(sp2)-Methyl Moiety .....      | C159    | Check        |
| PLAT380_ALERT_4_G | Incorrectly? Oriented X(sp2)-Methyl Moiety .....      | C171    | Check        |
| PLAT380_ALERT_4_G | Incorrectly? Oriented X(sp2)-Methyl Moiety .....      | C192    | Check        |
| PLAT380_ALERT_4_G | Incorrectly? Oriented X(sp2)-Methyl Moiety .....      | C233    | Check        |
| PLAT380_ALERT_4_G | Incorrectly? Oriented X(sp2)-Methyl Moiety .....      | C266    | Check        |
| PLAT380_ALERT_4_G | Incorrectly? Oriented X(sp2)-Methyl Moiety .....      | C278    | Check        |
| PLAT380_ALERT_4_G | Incorrectly? Oriented X(sp2)-Methyl Moiety .....      | C299    | Check        |
| PLAT380_ALERT_4_G | Incorrectly? Oriented X(sp2)-Methyl Moiety .....      | C332    | Check        |
| PLAT380_ALERT_4_G | Incorrectly? Oriented X(sp2)-Methyl Moiety .....      | C365    | Check        |
| PLAT380_ALERT_4_G | Incorrectly? Oriented X(sp2)-Methyl Moiety .....      | C377    | Check        |
| PLAT380_ALERT_4_G | Incorrectly? Oriented X(sp2)-Methyl Moiety .....      | C398    | Check        |
| PLAT380_ALERT_4_G | Incorrectly? Oriented X(sp2)-Methyl Moiety .....      | C410    | Check        |
| PLAT380_ALERT_4_G | Incorrectly? Oriented X(sp2)-Methyl Moiety .....      | C439    | Check        |
| PLAT380_ALERT_4_G | Incorrectly? Oriented X(sp2)-Methyl Moiety .....      | C451    | Check        |
| PLAT380_ALERT_4_G | Incorrectly? Oriented X(sp2)-Methyl Moiety .....      | C472    | Check        |
| PLAT380_ALERT_4_G | Incorrectly? Oriented X(sp2)-Methyl Moiety .....      | C484    | Check        |
| PLAT380_ALERT_4_G | Incorrectly? Oriented X(sp2)-Methyl Moiety .....      | C505    | Check        |

|                   |                                                  |        |              |
|-------------------|--------------------------------------------------|--------|--------------|
| PLAT380_ALERT_4_G | Incorrectly? Oriented X(sp2)-Methyl Moiety ..... | C517   | Check        |
| PLAT380_ALERT_4_G | Incorrectly? Oriented X(sp2)-Methyl Moiety ..... | C538   | Check        |
| PLAT380_ALERT_4_G | Incorrectly? Oriented X(sp2)-Methyl Moiety ..... | C550   | Check        |
| PLAT380_ALERT_4_G | Incorrectly? Oriented X(sp2)-Methyl Moiety ..... | C583   | Check        |
| PLAT380_ALERT_4_G | Incorrectly? Oriented X(sp2)-Methyl Moiety ..... | C604   | Check        |
| PLAT380_ALERT_4_G | Incorrectly? Oriented X(sp2)-Methyl Moiety ..... | C616   | Check        |
| PLAT606_ALERT_4_G | Solvent Accessible VOID(S) in Structure .....    | !      | Info         |
| PLAT608_ALERT_4_G | ADDSYM Test Skipped (Too Time-consuming) .....   | !      | Info         |
| PLAT794_ALERT_5_G | Tentative Bond Valency for Gd1 (III) .           | 3.59   | Info         |
| PLAT794_ALERT_5_G | Tentative Bond Valency for Gd8 (III) .           | 3.56   | Info         |
| PLAT794_ALERT_5_G | Tentative Bond Valency for Gd15 (III) .          | 3.59   | Info         |
| PLAT860_ALERT_3_G | Number of Least-Squares Restraints .....         | 66     | Note         |
| PLAT868_ALERT_4_G | ALERTS Due to the Use of _smtbx_masks Suppressed | !      | Info         |
| PLAT883_ALERT_1_G | No Info/Value for _atom_sites_solution_primary . |        | Please Do !  |
| PLAT899_ALERT_4_G | SHELXL2018 is Deprecated and Succeeded by SHELXL | 2019/3 | Note         |
| PLAT941_ALERT_3_G | Average HKL Measurement Multiplicity .....       | 2.3    | Low          |
| PLAT965_ALERT_2_G | The SHELXL WEIGHT Optimisation has not Converged |        | Please Check |

---

1 **ALERT level A** = Most likely a serious problem - resolve or explain  
 13 **ALERT level B** = A potentially serious problem, consider carefully  
 975 **ALERT level C** = Check. Ensure it is not caused by an omission or oversight  
 60 **ALERT level G** = General information/check it is not something unexpected

8 ALERT type 1 CIF construction/syntax error, inconsistent or missing data  
 168 ALERT type 2 Indicator that the structure model may be wrong or deficient  
 834 ALERT type 3 Indicator that the structure quality may be low  
 35 ALERT type 4 Improvement, methodology, query or suggestion  
 4 ALERT type 5 Informative message, check

---

It is advisable to attempt to resolve as many as possible of the alerts in all categories. Often the minor alerts point to easily fixed oversights, errors and omissions in your CIF or refinement strategy, so attention to these fine details can be worthwhile. In order to resolve some of the more serious problems it may be necessary to carry out additional measurements or structure refinements. However, the purpose of your study may justify the reported deviations and the more serious of these should normally be commented upon in the discussion or experimental section of a paper or in the "special\_details" fields of the CIF. checkCIF was carefully designed to identify outliers and unusual parameters, but every test has its limitations and alerts that are not important in a particular case may appear. Conversely, the absence of alerts does not guarantee there are no aspects of the results needing attention. It is up to the individual to critically assess their own results and, if necessary, seek expert advice.

### **Publication of your CIF in IUCr journals**

A basic structural check has been run on your CIF. These basic checks will be run on all CIFs submitted for publication in IUCr journals (*Acta Crystallographica*, *Journal of Applied Crystallography*, *Journal of Synchrotron Radiation*); however, if you intend to submit to *Acta Crystallographica Section C* or *E* or *IUCrData*, you should make sure that full publication checks are run on the final version of your CIF prior to submission.

### **Publication of your CIF in other journals**

Please refer to the *Notes for Authors* of the relevant journal for any special instructions relating to CIF submission.

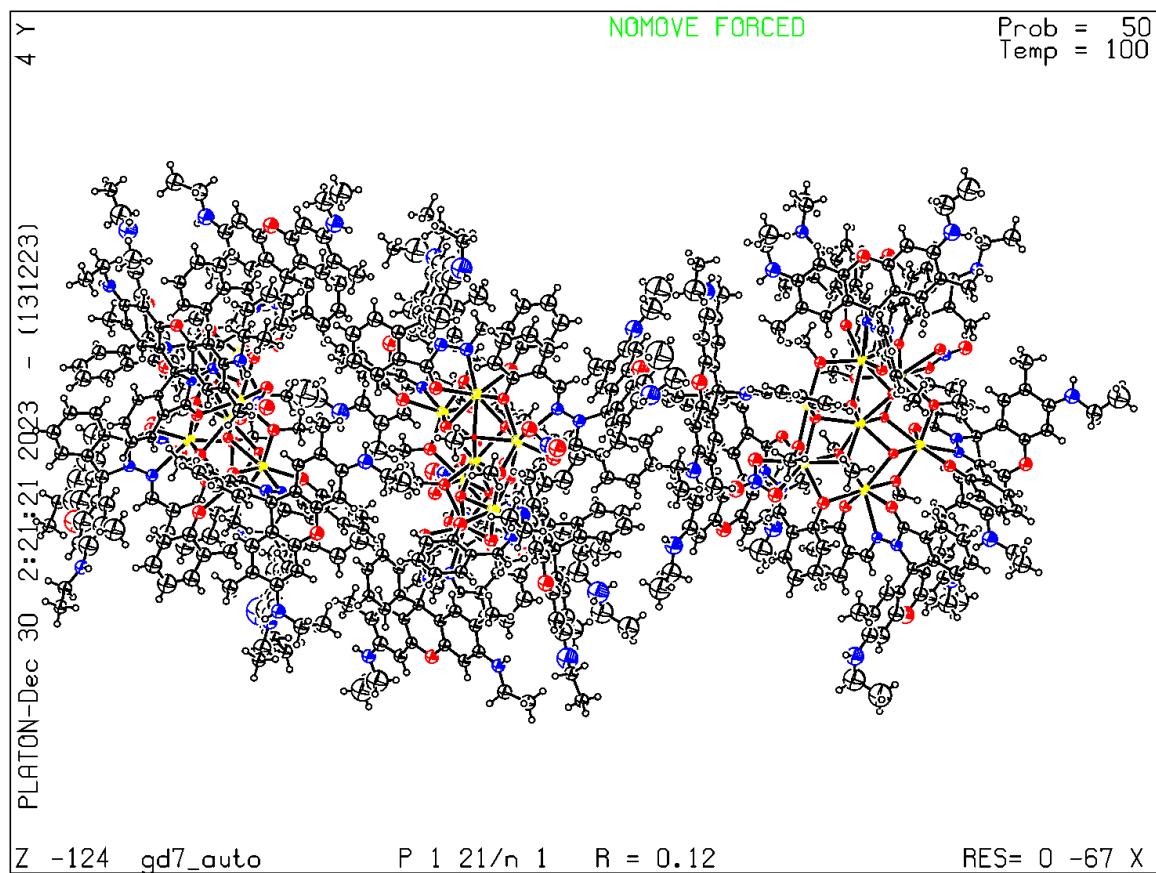

Supplement: Supplementary file 2 [file supplementary]
